# Supplementary material
Source: publisher figshare collection journal article supplement (https://acs.figshare.com/ndownloader/files/6491700)
Supplement: Supplementary file 1 [file 6491700]

## Sheet: Sheet1
Index	Fraction	Relative free energy [kcal/mol]	A-1:A10 [%]	G+1:A10 [%]	A-1:A9 [%]	G+1:A9 [%]	U+2:G8 [%]	C+3:G8 [%]	U+2:A7 [%]	C+3:A7 [%]	base-pairs	A7 C2'-endo [%]	A7 C3'-endo [%]	G8 C2'-endo [%]	G8 C3'-endo [%]	A9 C2'-endo[%]	A9 C3'-endo [%]	A-1 C2'-endo [%]	A-1 C3'-endo [%]	G+1 C2'-endo [%]	G+1 C3'-endo [%]	U+2 C2'-endo [%]	U+2 C3'-endo [%]	C+3 C2'-endo [%]	C+3 C3'-endo [%]	A7 extra-helical [%]	G8 extra-helical [%]	A9 extra-helical [%]	A-1 extra-helical [%]	G+1 extra-helical [%]	U+2 extra-helical [%]	C+3 extra-helical [%]	RMSD to docked [Å]	O2'(A-1)-P(G+1) distance	O2'(A-1)-P(G+1)-O5'(G+1) angle	snapshots with dist<3.2 and angle>150	shapshots with angle>120
175	0.0654255	0	98.385	0.125	0.001	0.617	14.575	14.352	22.663	42.511	AA..xxCA	0	89.912	0.254	90.975	49.096	36.181	0	93.022	52.181	37.118	43.083	48.51	0	90.869	0.027	8.228	97.553	0.001	1.464	5.386	0.48	3.614	3.644	61.061	0	0
20	0.0606408	0.0448066	63.283	5.331	0	80.422	0.017	0	0.007	59.304	AAga..CA	0	91.271	51.309	35.978	0	88.971	0.312	89.667	0	92.601	0	94.444	0.025	92.664	0.645	98.409	37.313	0.132	0.015	0.029	0.649	3.824	3.837	66.422	0	3
0	0.0524581	0.13033	97.938	0.038	0	0	9.373	16.396	5.043	66.541	AA..cgCA	0	90.453	3.612	82.84	13.947	64.976	0	90.393	22.243	67.954	17.809	70.145	0.001	92.047	0.029	12.005	99.981	0.002	3.969	8.241	1.756	3.778	3.632	59.531	0	0
123	0.0506624	0.150879	83.993	1.782	0.066	0.54	0	0.001	89.597	0.018	AA....UA	0	96.292	0.02	81.233	0.012	91.48	0	92.561	0.619	92.993	73.396	0.77	0.002	91.728	1.138	49.595	43.982	0.001	0.034	11.171	26.217	4.165	3.792	63.685	0	0
170	0.0500511	0.158042	98.531	0	0	0.004	1.389	6.053	0	86.669	AA....CA	0	91.228	0	91.176	47.581	36.174	0	92.279	5.236	85.988	9.921	70.014	0	91.446	0.008	1.211	99.97	0.001	5.159	33.685	1.404	3.529	3.643	59.898	0	0
143	0.0443429	0.229486	94.225	0.841	0	1.943	2.027	12.163	0	25.221	AA..cgCA	0	91.762	0.163	87.97	5.155	74.217	0	90.925	0	92.003	0.024	94.593	13.458	78.571	0.036	8.889	12.099	0.021	0.232	0.749	5.593	4.488	3.639	59.959	0	0
132	0.0348675	0.37132	55.136	16.055	0.012	32.025	1.905	0.131	82.172	1.011	AAga..UA	0	91.076	18.439	65.239	0.463	87.084	0	89.778	46.054	25.674	49.169	33.452	0.48	91.627	0.477	9.153	19.289	0.037	1.59	69.204	71.607	4.14	3.846	68.508	0	0
181	0.0321472	0.419246	0.471	96.198	0.005	0.288	0	0	49.84	0	GA....UA	0	91.969	0.002	82.792	0.06	81.772	0	91.376	44.59	39.023	88.065	0.123	0.002	92.068	3.545	33.42	0.143	0.06	0.029	41.63	20.454	4.174	3.884	67.299	0	0
94	0.0297783	0.464408	99.878	0	0	47.591	0	0.239	0	35.059	AAga..CA	0	89.192	0	89.325	87.474	2.596	0	89.22	0.002	94.705	0.438	88.445	0	88.539	0.091	0.003	0.058	0.042	97.064	97.155	1.198	4.071	3.537	61.518	0	1
246	0.0210096	0.670201	47.599	2.486	0.032	81.152	2.733	0.967	4.316	71.537	AAga..CA	0.071	88.963	19.591	64.255	5.269	82.358	0.135	89.571	4.265	85.166	19.269	72.553	0	93.198	0.117	9.292	16.888	0.053	2.157	10.013	1.178	4.327	3.875	68.613	0	0
145	0.018953	0.730982	78.615	0.081	1.546	1.994	1.053	0	98.159	0	AA....UA	0	91.483	0.107	92.544	45.941	38.459	0.003	89.576	5.325	64.229	0	90.41	4.868	85.873	0	4.692	38.787	1.305	97.714	97.894	99.58	5.517	4.003	75.752	0	3
155	0.0169785	0.795889	87.932	0.062	0.295	1.692	1.045	0	85.175	0	AA....UA	0	93.932	0.199	93.932	44.227	44.523	0.009	90.491	1.44	51.15	0	90.394	2.465	89.619	0.023	29.763	41.905	0.398	99.202	99.469	100	6.162	4.043	76.862	0	1
61	0.016625	0.808304	98.288	0	0	0.032	7.356	81.037	0	8.399	AA..cg..	0	90.886	0	84.745	70.592	8.164	0	93.374	76.564	7.501	0.052	92.775	0	91.557	0.017	0.276	99.791	0	0.384	0.154	0.145	3.973	3.622	60.433	0	0
249	0.0157788	0.839126	97.986	0.392	0.006	6.026	37.479	35.178	0.003	33.091	AA..xxCA	0	91.183	0	88.089	8.226	77.96	0	88.726	0	91.22	0.269	90.746	0	91.45	0.046	0.174	0.649	0.107	4.627	0.462	0.184	2.784	3.596	63.676	0	1
160	0.0154535	0.851417	62.555	7.745	0	1.617	1.427	0.62	0.012	86.683	AA....CA	0	92.71	0.075	88.718	1.549	79.861	0	91.38	0	92.131	0.801	94.895	0.003	93.617	0.09	9.596	41.213	0.037	1.337	0.807	2.147	4.824	3.774	65.132	0	0
100	0.0138824	0.914673	91.048	0	0.281	0.233	18.261	0	67.546	0	AA..ugUA	0	92.417	0.069	89.551	27.098	61.866	0.094	89.659	2.831	65.486	0	89.711	8.872	81.906	0	3.845	39.607	0.382	70.832	70.911	99.997	5.923	4.027	76.085	0	1
201	0.0129419	0.95606	4.823	81.077	0	0.247	0	0.004	0	95.233	GA....CA	0	92.003	0	91.072	0.142	59.677	0	88.707	0	91.068	0.677	94.204	0	94.443	0.109	0.041	0.161	6.863	0.007	0.176	4.228	5.837	4.092	85.027	0	0
26	0.0127734	0.963791	58.429	17.652	6.79	35.489	1.571	0	98.019	0	AAga..UA	0	92.065	9.645	80.845	2.361	67.129	0.004	91.018	28.254	49.876	12.975	68.39	6.802	84.672	0.011	1.19	3.197	0.03	1.514	96.976	100	4.911	3.808	65.81	0	0
59	0.0124934	0.97687	93.344	1.235	0.054	4.115	0	1.992	0.015	93.286	AA....CA	0	92.02	0.235	90.712	34.953	47.813	0	92.765	10.601	81.365	11.844	68.768	0	91.893	0.097	21.789	83.195	0.004	8.335	99.649	0.988	4.302	3.707	63.237	0	21
237	0.0122969	0.986224	85.97	10.292	0	0.137	3.187	1.152	0.699	83.541	AA....CA	0	92.231	0.004	92.657	0.551	87.251	0	92.88	0.004	89.997	10.967	80.889	0	95.001	0.082	0.746	5.894	0.004	5.441	53.213	2.453	5.239	3.763	64.238	0	0
208	0.0108762	1.05866	66.286	31.526	0	7.47	6.132	0.868	0	55.971	AA....CA	0	88.006	0.066	91.16	6.411	72.334	0	92.383	0.31	89.242	0.58	87.93	0	90.208	0.013	0.058	1.258	0.049	0.634	25.77	0.027	3.479	3.744	65.984	0	0
67	0.0102141	1.09571	42.687	12.159	0	34.231	0	12.343	0	82.553	AAgacgCA	0	91.383	3.518	66.043	0	81.535	0	89.48	33.393	40.325	30.415	51.939	0	90.375	0.204	5.35	5.658	0.066	5.615	99.995	2.116	4.379	3.958	75.436	0	0
108	0.00970394	1.12594	15.421	49.292	0.179	27.612	0.596	0	99.612	0	GAga..UA	0	93.507	10.06	80.928	0.363	81.927	0	88.176	64.832	2.335	11.382	69.084	8.739	82.543	0	2.027	6.289	0.04	3.786	99.866	100	5.066	3.839	67.607	0	0
174	0.00897433	1.17206	99.656	0	0	0.005	0	0	0	0	AA......	0	87.898	0	92.943	66.018	0	0	88.675	36.846	44.723	65.898	15.113	0	85.985	3.471	0	0	0.027	99.989	100	4.57	5.807	4.272	91.621	0	0
1	0.00884215	1.18082	0	0	97.06	0.011	5.968	0	97.83	0	..aa..UA	0	91.508	0	92.945	50.014	26.521	0	88.551	30.477	53.73	0	83.442	10.804	74.283	0.027	3.186	99.989	0.027	8.361	99.94	100	5.29	3.611	60.049	0	0
227	0.0087405	1.18764	23.919	3.065	0.281	89.923	0.028	0	97.232	0	AAga..UA	0	92.179	10.127	82.46	0.077	86.483	0	86.786	65.003	11.42	41.029	34.629	12.977	79.301	1.943	0.732	1.502	0.325	6.962	97.512	99.994	5.068	3.823	66.714	0	0
136	0.008187	1.22623	97.03	0.709	0	0.012	0.679	8.698	0	0.106	AA......	0	91.166	0.053	87.652	5.019	69.73	0	90.422	0	91.083	0.248	85.951	0.012	93.652	0.106	0.041	0.23	0.012	1.317	1.305	1.565	4.028	3.635	60.231	0	0
157	0.00798005	1.24134	31.588	0	2.265	0.072	1.307	0	98.964	0	AA....UA	0	93.38	0	93.392	23.938	60.514	0.024	90.525	4.108	60.671	0	87.977	5.903	82.465	0	8.355	92.832	5.138	98.548	99.94	100	5.949	4.082	77.772	0	3
150	0.00787459	1.24919	0	1.101	93.957	1.156	2.569	0	99.156	0	..aa..UA	0	90.93	0.251	93.046	39.45	26.177	0	86.502	25.003	59.162	0	83.609	16.006	65.407	0.024	2.257	86.128	0.049	4.881	99.994	100	5.013	3.632	60.204	0	0
129	0.00751235	1.27697	4.485	72.479	0	0.006	0	0	0	94.246	GA....CA	0	92.126	0	91.572	0.045	91.075	0	87.383	0	90.979	1.063	94.194	0	95.96	0.677	0.052	0.032	3.692	0.045	0.805	1.205	6.421	4.042	82.485	0	0
195	0.00722725	1.2998	53.892	3.728	0.027	78.312	0	7.824	0.027	78.005	AAga..CA	0	90.793	3.314	88.528	0.073	85.815	0	89.17	6.127	83.37	26.612	58.188	0	84.746	0.274	3.534	12.481	0.027	1.089	96.873	0.588	4.36	3.931	70.49	0	0
42	0.00720187	1.30188	67.227	24.654	0	0.108	0	0.269	0.027	95.863	AA....CA	0	92.823	0	93.791	0	85.43	0	92.91	0.007	91.114	1.325	91.605	0	93.455	0.013	0.013	0.202	0.067	13.81	89.722	2.778	5.524	3.745	63.704	0	0
5	0.00713139	1.30768	99.373	0	0	0	12.417	0	0	0	AA..ug..	0	83.482	0	89.367	59.165	0	0	87.133	0	82.031	1.58	88.311	16.075	73.476	0.375	0.02	0.02	0.041	100	100	100	5.566	4.171	86.61	0	0
12	0.00706266	1.31339	91.986	0.123	0	0.027	4.546	0	99.065	0	AA....UA	0	91.228	9.147	81.337	15.653	60.1	0	90.184	37.77	49.901	15.127	68.237	6.239	84.525	0	3.98	99.454	0	7.018	99.577	100	5.08	3.673	61.191	0	0
167	0.0065176	1.36078	54.026	4.702	3.261	39.874	0.473	0	95.919	0	AAga..UA	0	92.665	17.338	71.512	1.405	83.238	0	89.811	44.88	30.957	14.543	61.915	4.909	86.795	0	6.418	26.203	0.015	0.754	94.78	100	5.151	3.845	68.741	0	0
47	0.00651416	1.36109	99.71	0	0	8.907	57.406	0.669	0	1.211	AA..ug..	0	90.321	0	90.113	10.868	76.668	0	88.806	0	91.391	0	90.722	0	93.656	0.015	0.126	0.193	0.342	12.688	0.007	0.483	2.983	3.646	62.243	0	0
231	0.00641582	1.37007	8.945	82.508	0	2.371	0.165	0.023	56.754	6.911	GA....UA	0	93.471	0.645	83.303	0.585	81.067	0	90.965	27.353	58.104	79.446	3.947	0.008	90.702	1.043	39.254	2.184	0.518	0.27	17.342	16.374	4.271	3.902	69.009	0	0
118	0.00637474	1.37386	5.694	0.968	0	2.367	0.015	0	93.694	0.076	......UA	0	95.864	0.151	83.985	0.038	81.24	0	89.958	8.25	70.631	75.025	1.732	0.015	91.811	1.263	36.696	39.123	7.35	90.268	15.448	30.268	4.985	3.986	74.035	0	2
190	0.00632293	1.37867	54.568	19.55	0.008	50.049	0	10.217	3.537	57.923	AAgacgCA	0	90.501	12.068	59.359	0.015	83.617	0	90.516	36.485	38.366	18.469	67.747	0	87.796	0.083	1.655	0.703	0.28	1.307	87.07	7.935	4.509	3.986	76.113	0	0
128	0.00602723	1.40693	85.19	2.981	0	5.658	27.08	52.565	0.321	45.961	AA..cgCA	0	89.197	0.096	85.006	5.69	79.179	0	91.497	50.112	35.855	0.665	92.106	0	91.433	0	0.2	35.559	0	0.425	3.35	1.29	3.629	3.663	61.159	0	0
104	0.005967	1.41285	97.516	0.146	0	0.146	0.154	0.089	0	0.016	AA......	0	91.099	0.016	85.944	56.255	22.763	0	91.617	0.024	90.452	0	94.603	42.96	41.706	0.024	1.27	97.734	0.008	0.024	0.024	71.484	3.798	3.671	61.538	0	0
209	0.00583833	1.42572	69.641	2.565	0	4.759	1.757	0.058	70.746	13.971	AA....UA	0	88.8	41.765	36.709	9.179	74.087	0	91.414	45.394	38.029	72.107	12.734	0	92.289	0.082	8.52	87.01	0.008	2.078	77.905	66.763	3.997	3.809	66.11	0	0
240	0.0057815	1.43149	79.379	3.695	16.491	1.568	2.961	0	98.065	0	AAaa..UA	0	91.25	4.296	84.443	18.277	56.281	0.008	89.473	34.318	53.437	1.118	83.208	7.457	79.997	0	2.995	75.033	0	9.326	99.007	100	5.045	3.638	60.573	0	0
203	0.00566164	1.44385	1.615	80.093	0	3.255	0	0.093	0.008	86.247	GA....CA	0	92.537	0	92.588	0.025	84.981	0	93.081	0	84.683	17.034	74.722	0	95.147	0.246	0.025	0.008	0.085	0.195	13.149	10.684	5.221	3.873	67.746	0	0
189	0.00565926	1.44409	99.331	0	0	0	0	0	0	0	AA......	0	82.321	0	90.268	58.634	0	0	87.358	0	79.368	2.077	79.677	3.081	89.478	0.343	0	0	0.06	100	99.906	99.94	5.588	4.169	85.955	0	1
52	0.00562171	1.44802	25.082	33.018	0	0	0.603	0	0	94.922	GA....CA	0	93.433	0	85.049	14.564	66.802	0	92.727	0	93.441	0.086	95.696	0	89.129	0.009	2.591	32.097	0.052	0.009	0.646	1.988	4.69	3.834	65.951	0	0
198	0.00557117	1.45335	68.664	4.625	0.009	48.574	0.787	12.535	0.043	75.726	AAgacgCA	0	90.621	2.075	89.039	3.328	78.942	0	90.128	3.553	85.261	13.339	71.724	0	86.54	0.017	0.925	21.827	0.069	3.786	88.503	0.432	3.94	3.874	68.473	0	0
248	0.00522917	1.49073	88.72	0.046	0	0	1.001	0.751	0	75.911	AA....CA	0	94.049	0	84.28	0.176	82.816	0	92.094	0	94.003	0	96.237	0	92.78	0.102	3.837	66.382	0.009	0.009	0.028	1.863	5.307	3.659	59.441	0	0
202	0.00498469	1.51898	99.098	0.029	0	7.954	0	0	0	3.026	AA......	0	88.272	0.116	93.772	0	87.574	0	92.521	0	94.801	0	97.439	3.773	84.935	0.834	100	73.46	0	0	0	7.265	3.506	3.719	61.298	0	0
60	0.0047928	1.54214	6.112	89.387	0.03	5.458	0.01	0.04	39.251	17.46	GA....UA	0	88.329	2.96	84.634	0.06	74.111	0	89.8	71.987	7.401	87.806	2.155	0	93.072	0.272	6.606	1.46	0.423	0.131	13.835	4.531	3.952	3.951	70.662	0	1
70	0.00472923	1.55002	3.007	17.306	0	0	0.716	0.02	0	96.584	GA....CA	0	93.638	0	86.346	1.319	85.926	0	94.017	0	93.536	0.061	96.349	0	91.777	0	0.082	7.804	0.092	0	1.749	2.25	4.775	3.815	65.504	0	0
186	0.00461822	1.56403	95.939	0.021	0	0.01	0.052	0	0.775	95.143	AA....CA	0	87.681	13.659	62.613	28.763	45.625	0	91.082	1.392	90.842	71.52	12.309	0.01	90.601	0.052	97.865	99.519	0	11.922	39.073	1.486	4.939	3.631	59.11	0	0
111	0.0043811	1.59513	61.776	26.202	0	9.8	0.011	2.321	0	86.116	AA....CA	0	92.226	0.985	90.266	0.175	67.897	0	90.77	2.157	84.233	13.358	70.667	0	94.58	0.208	0.756	1.04	0.011	1.796	39.472	3.493	4.584	3.907	71.189	0	0
119	0.00437361	1.59614	40.965	2.39	0.154	58.586	4.572	0	91.502	0	AAga..UA	0	92.116	5.691	85.921	7.928	66.809	0	88.092	45.23	28.827	34.287	46.228	10.877	74.945	0	0.647	7.434	3.026	35.954	89.66	100	5.354	3.891	69.793	0	0
193	0.0041496	1.62716	99.661	0	0	0	30.911	0	0.386	0	AA..ug..	0	84.714	0	88.881	66.339	0.012	0	87.008	0	78.418	2.364	89.092	11.049	79.927	0.386	0.023	0.012	0.023	99.567	99.625	99.977	5.403	4.19	87.051	0	0
242	0.0041334	1.62947	56.416	10.628	0	58.353	0.525	19.844	0	30.11	AAgacgCA	0	91.496	2.916	87.098	0	85.208	0	89.536	19.82	58.271	6.965	82.571	0.012	89.221	0.047	0.513	4.34	0.012	0.315	70.287	4.235	3.968	3.926	71.765	0	0
107	0.0040506	1.64141	49.081	1.48	0	58.321	0.275	0.489	0	64.076	AAga..CA	0	89.995	0.931	90.962	0.979	62.691	0	89.625	0.024	87.488	1.671	93.768	0	90.318	0	0.072	84.491	0	0.704	24.749	0.227	3.731	3.905	67.791	0	0
84	0.00389448	1.6646	92.71	0.21	0	0	2.401	0	99.517	0.012	AA....UA	0	88.131	3.75	88.156	6.559	74.332	0	89.146	18.948	71.597	5.644	78.032	3.8	87.71	0	2.24	100	0.012	9.035	99.839	99.963	4.536	3.655	59.954	0	0
207	0.00363959	1.70453	73.516	13.202	0.027	33.178	0	3.148	0	80.741	AAga..CA	0	90.238	0.677	90.118	0.04	55.505	0	90.982	26.67	58.813	12.472	75.296	0	84.155	0.146	7.039	0.305	0.279	0.345	95.378	1.647	4.304	3.923	71.974	0	0
81	0.00353459	1.72181	0.163	15.178	58.666	1.708	1.165	0	95.853	0.054	GAaa..UA	0	89.348	4.553	84.768	27.172	41.876	0	87.885	19.908	63.423	12.508	71.053	0.366	89.89	0.285	7.792	41.225	0.054	5.326	86.326	91.354	4.456	3.717	62.934	0	0
239	0.00353186	1.72226	68.282	6.04	0	6.827	2.484	0	98.996	0	AA....UA	0	89.672	7.519	82.112	3.203	76.982	0	91.056	29.425	51.289	12.595	70.589	8.523	82.234	0	3.366	68.255	0.027	2.904	99.525	99.986	4.49	3.819	67.166	0	0
87	0.00351478	1.72512	0	0	94.572	0.055	1.773	0	86.643	0	..aa..UA	0	90.065	0	93.473	35.647	39.7	0	88.333	33.475	48.605	0	84.458	6.83	83.18	0.412	3.834	99.973	0.014	7.077	99.409	99.973	4.686	3.611	60.182	0	0
200	0.00334233	1.7548	97.872	0.999	0	0	0	0	0	0	AA......	0	86.479	0	94.572	0.014	87.116	0	90.504	0	92.024	0.955	76.187	0	95.512	0	3.995	100	0	0.101	2.316	1.549	3.49	3.723	61.091	0	0
50	0.00313824	1.79198	97.443	0.612	1.271	0	1.102	0	99.74	0	AA....UA	0	89.205	2.618	86.955	8.804	66.131	0	89.971	40.346	47.374	0.597	84.826	7.227	82.943	0	1.286	98.178	0	13.428	99.862	100	4.494	3.621	60.245	0	0
48	0.00310326	1.79859	6.365	3.323	0	72.605	0.203	0	6.677	0	..ga....	0	91.7	0.062	94.509	0.234	84.431	0	93.978	0.437	68.175	0.047	89.251	0.016	93.885	0.14	3.401	1.342	34.665	98.487	99.984	100	6.285	4.12	78.511	0	0
204	0.00304449	1.80987	96.305	0	0.334	0.111	0	0.143	0	91.241	AA....CA	0	90.46	0	93.47	0.143	88.565	0	91.336	18.14	64.931	1.465	86.367	0	91.782	0.096	0.032	0	0.175	99.267	99.841	1.991	4.586	3.695	86.895	2	1541
53	0.00300835	1.81692	96.603	0.08	0	2.334	0	6.986	0	0.016	AA......	0	90.695	0.177	82.679	62.234	17.354	0	92.225	0	92.965	0	93.593	62.476	16.71	0.032	0.274	29.636	0	0.193	0	2.141	5.43	3.625	59.051	0	0
159	0.00297967	1.82257	97.254	0.289	0.032	0.096	0	0.209	0	91.489	AA....CA	0	90.75	0	92.292	0.193	87.265	0	91.457	0.08	87.185	0.45	91.28	0	92.163	0.112	0.353	0.369	0.08	67.785	97.045	2.859	4.491	3.652	64.764	0	12
163	0.00295291	1.82789	99.688	0	0	0	0	0.016	0	0	AA......	0	90.184	0	91.349	0	90.282	0	93.713	0	90.791	1.674	75.312	0	92.137	0.788	0	0.016	0.115	1.264	4.514	0.066	3.732	3.598	63.114	0	0
192	0.00290451	1.83764	10.636	80.06	0.732	9.504	0.1	0	97.254	0	GA....UA	0	90.296	21.138	64.98	0.816	77.613	0	90.213	65.513	9.138	0.915	86.967	9.121	80.226	0.133	0.982	2.713	0.549	0.133	99.834	100	4.332	3.88	68.065	0	0
62	0.00288782	1.84104	31.175	8.952	0	98.946	0.736	3.899	0.05	55.706	AAga..CA	0	90.144	36.68	35.375	0	91.767	0	87.902	0	91.633	0	94.963	1.104	91.215	2.845	99.933	32.463	0.05	0.117	0	0.669	3.714	3.811	64.988	0	0
138	0.0028544	1.84791	58.106	6.421	0	80.688	0	0	0.607	61.678	AAga..CA	0	89.788	15.201	63.482	0.034	84.193	0	89.821	0	92.012	0	95.501	2.865	88.793	0.961	100	26.744	0	0	0.067	2.545	3.898	3.845	66.598	0	0
43	0.00276775	1.8661	98.816	0	0	0	0	0	0	0	AA......	0	88.757	0	93.99	62.63	0	0	88.704	12.692	70.956	1.75	79.282	0.088	88.174	3.553	0	0	0.053	100	99.947	14.495	5.461	4.133	87.137	0	3
21	0.00264062	1.89384	29.392	0.221	0.239	89.521	0	0	0.313	82.265	AAga..CA	0.092	85.764	10.424	78.803	0.147	91.989	0	91.105	0.018	87.477	0.442	95.488	0	95.304	0.552	8.656	0.829	0.018	2.541	5.488	0.681	4.873	3.921	72.867	0	0
166	0.00262859	1.89653	0	14.86	0	0	0.11	0	2.792	86.352	GA....CA	0	92.01	0	90.558	0	84.974	0	90.411	5.97	79.188	6.374	82.237	0	95.151	0.073	0.79	36.793	0.331	0	6.833	5.511	3.728	3.898	68.347	0	0
229	0.00252214	1.92093	95.869	0.688	0	37.866	14.936	0.956	0.057	3.213	AAgaug..	0	90.667	0	86.67	9.313	74.431	0	89.807	0.019	89.463	0	89.845	0.899	92.14	0.019	0.287	12.125	0	0.172	0.249	1.817	3.438	3.697	63.028	0	0
124	0.00235079	1.96243	90.167	0	0	0	0	1.67	0	0.495	AA......	0.021	93.651	0	89.301	0	90.353	0	90.909	0	91.569	0.021	95.836	0.021	95.547	0.433	0.124	1.134	0	0.144	0.124	8.617	6.157	3.627	58.772	0	0
64	0.00227397	1.98204	99.828	0	0	0	0	0.021	0	0	AA......	0	91.02	0	92.009	48.958	0	0	88.013	0	87.197	1.697	77.422	0	92.911	0.021	0	0	0.043	100	99.936	99.979	5.281	4.213	91.538	0	1
164	0.00224985	1.98833	91.695	0.258	0	0.751	1.18	0	13.112	31.91	AA....CA	0	89.893	3.734	86.974	9.142	72.446	0	90.622	3.605	89.013	17.639	71.652	0	91.738	0.343	33.627	96.695	0	9.163	28.927	13.069	4.296	3.676	60.42	0	0
235	0.00216693	2.01048	76.042	3.856	0	19.304	14.251	48.87	0.022	14.273	AAgacgCA	0	92.62	0.222	88.409	0.997	86.791	0	90.758	33.688	51.396	9.198	83.422	0	92.132	1.042	7.225	17.775	0.044	0.332	13.719	0.377	3.617	3.787	65.537	0	0
32	0.00213686	2.01873	98.641	0	0	0	0	15.693	0	51.11	AA..cgCA	0	89.085	0.159	90.489	0.702	83.197	0	89.9	15.919	76.155	21.966	63.972	0	80.752	0.023	2.785	100	0	11.481	99.253	0.226	4.269	3.617	58.595	0	0
141	0.00211308	2.02533	46.759	1.904	0	8.092	1.269	0	97.257	0	AA....UA	0	91.727	5.19	81.414	7.752	69.13	0.045	89.461	40.118	39.325	9.429	75.884	10.63	79.51	0	2.652	69.946	4.102	51.995	99.887	100	5.279	3.851	68.815	0	0
89	0.00208574	2.03301	0.117	86.237	0	3.266	0	0	0	96.664	GA....CA	0	92.606	0.047	94.355	0	92.022	0	94.122	0.303	83.065	2.776	89.97	0	96.128	0.117	0.07	0.606	0.047	0.023	23.07	2.636	4.94	3.862	67.001	0	0
161	0.00206159	2.03989	43.746	38.368	0.14	47.253	8.44	1.707	0	62.754	AAga..CA	0	89.572	0.935	88.193	0.023	86.813	0	91.349	4.887	83.376	4.606	84.148	0	92.775	0.164	2.525	4.606	1.66	0.117	38.017	0.608	3.62	3.94	71.888	0	0
114	0.00204927	2.04342	7.277	0.236	0.118	0.377	0	0.024	0	98.846	......CA	0	92.558	0	93.076	0	92.157	0	85.327	0.071	89.378	67.664	9.774	0	92.134	0.024	0.495	0.33	0.047	3.815	73.599	0.589	6.315	4.107	81.802	0	149
13	0.00195893	2.07002	81.599	0.025	0	0	0.397	2.086	0	55.798	AA....CA	0	91.433	0	88.999	1.117	88.95	0	91.756	0	93.767	0.025	94.562	0.074	95.53	0.025	3.278	14.626	0.174	0.074	0.025	2.26	6.387	3.631	58.938	0	0
92	0.00190945	2.08512	98.374	0	0	0.025	0.635	0	55.245	0	AA....UA	0	90.577	0	90.475	66.193	0.025	0	87.148	0	86.767	0	76.226	3.531	87.859	4.851	0.61	1.854	0.102	9.093	14.478	100	5.66	4.146	89.333	0	4
180	0.00182839	2.11071	69.192	12.117	0	52.27	0	0	0	66.922	AAga..CA	0	92.371	3.458	84.583	0	82.577	0	91.526	0	91.499	0	94.747	0.053	90.312	2.138	100	30.016	0	0	0.422	5.174	3.891	3.816	66.383	0	0
236	0.00181518	2.11499	3.647	3.887	0	0.106	1.704	89.297	0	2.929	....cg..	0	93.211	0	94.302	0	91.134	0	91.001	0	86.022	0.08	94.702	0	95.82	0	0	0.106	0.027	0.24	0.612	0.772	4.963	3.714	63.195	0	0
214	0.00177476	2.12828	26.002	0.736	61.706	24.721	0.055	0	54.293	0	AAaa..UA	0	93.404	0.027	91.932	0	85.691	0	91.224	0.245	88.716	0.136	86.781	15.972	71.709	16.544	15.29	5.369	0.027	2.317	98.555	98.91	4.622	3.791	66.971	0	0
153	0.00175807	2.13385	98.021	0	0	0	0	3.325	0	92.718	AA....CA	0	92.223	0.302	90.794	3.078	75.158	0	91.481	0.824	92.47	19.566	65.513	0	92.333	0	0.907	100	0	20.39	99.863	0.742	4.157	3.619	59.154	0	0
41	0.00173117	2.14295	14.936	14.126	0	98.855	1.34	0	0.056	90.815	XXga..CA	0	92.686	74.372	2.54	0	88.61	11.474	75.851	0	92.965	0.168	93.244	0	92.379	0.168	97.878	37.326	3.936	0.558	0	0.81	4.672	3.89	72.688	0	0
55	0.00171308	2.14915	10.082	0	1.324	0.028	0.451	0	98.986	0	AA....UA	0	92.115	0	92.819	22.247	60.941	0	90.369	4.816	71.304	0	90.538	1.098	91.101	0	2.394	99.718	23.233	98.93	99.916	99.944	5.541	4.109	80.228	0	2
117	0.00170366	2.1524	90.336	0	45.465	6.951	1.469	0	99.294	0	AAaa..UA	0	90.534	1.102	89.008	7.827	82.622	0.057	88.782	1.837	83.696	22.012	53.885	12.574	76.547	0	1.95	10.54	0.226	29.246	98.389	100	5.431	4.114	82.599	0	0
112	0.00165438	2.16971	99.059	0	0	0	0.823	0	0	0	AA......	0	85.563	0	90.503	61.952	0	0	87.033	0	82.505	8.733	81.623	47.457	33.52	0.911	0	0	0.059	100	36.548	38.136	5.216	4.184	87.09	0	2
178	0.00163233	2.17763	69.167	21.766	0	7.708	52.481	0.148	0.473	0	AA..ug..	0	91.081	0.059	89.014	2.097	86.208	0	92.233	0.148	87.064	0	93.119	0.295	91.583	0.266	0.502	6.999	0.03	0.502	18.074	3.101	4.595	3.843	69.067	0	0
228	0.00163231	2.17764	96.368	0.03	0.325	16.534	2.834	0	0	0.768	AAga....	0	90.729	0.502	87.127	0	92.058	0	89.105	0	90.788	0	87.216	0.62	93.534	0	0.709	12.666	0.384	20.165	0.709	30.469	4.619	4.017	76.03	0	0
173	0.00162234	2.18125	94.905	0.179	0	0.924	0.358	0	0.089	0	AA......	0	94.13	0	79.857	70.59	3.01	0	92.968	0.089	93.385	0	96.633	1.788	73.361	0	0.06	93.981	0.119	0.06	0.119	34.893	4.313	3.862	70.25	0	0
79	0.00160704	2.18685	78.938	0.996	0	0.935	1.78	9.022	0	77.339	AA....CA	0	90.314	0	92.486	0.03	86.844	0	93.724	0.091	90.163	0.181	93.301	0	95.413	0.03	0.03	0.06	0.724	0.181	0.845	1.298	3.488	3.832	65.951	0	0
152	0.00152987	2.21588	3.825	3.636	0	1.075	0.126	1.802	0	16.883	......CA	0	90.737	0.569	84.192	0	94.499	0	91.148	0.601	91.906	5.533	76.731	0	95.131	0.316	0.664	6.007	0.032	0.537	28.897	36.674	4.012	3.684	61.926	0	0
216	0.00152347	2.21835	12.933	47.474	0	1.112	0.286	0.286	40.165	32.412	GA....UA	0	90.721	0.286	94.217	0	84.716	0	92.405	0.286	87.385	92.088	0.318	0	93.232	0	0.032	0	1.493	28.758	31.776	6.546	4.922	3.832	66.591	0	0
140	0.00149815	2.22824	28.984	10.254	0.254	71.46	0	1.079	0	76.73	AAga..CA	0	92.381	1.429	88.413	0.063	81.048	0	87.587	10.667	74.698	25.873	61.524	0	92.286	0.032	0.635	5.683	0.667	6.381	74.571	3.651	4.744	3.892	69.078	0	0
144	0.00149214	2.23061	57.743	2.037	0.194	69.479	0	0.194	0	90.98	AAga..CA	0	90.818	0.065	92.726	0.323	73.456	0	89.622	2.554	88.587	29.292	50.954	0	91.917	0.226	6.596	2.296	0.032	5.108	100	0.873	4.439	3.882	68.442	0	0
75	0.00142537	2.25762	9.508	8.149	0	99.287	0.475	0	0.034	20.475	..ga..CA	0	91.443	80.068	0.611	0	89.813	1.256	86.859	0	95.144	0	95.416	0.645	91.002	9.576	96.435	49.202	0.407	0.102	0.374	6.18	4.575	3.734	62.615	0	0
149	0.0013926	2.27135	1.973	0	94.6	0.035	7.58	0	0.069	0	..aa....	0	90.723	67.394	0.588	0	85.843	0	91.312	0	94.531	0	92.696	0	93.666	0	0.277	2.25	0	0.312	1.004	100	5.806	3.633	59.066	0	0
33	0.00135835	2.28604	52.274	33.475	0.178	3.945	0	0	69.545	0.036	AA....UA	0	95.203	1.315	79.247	0	87.313	0	92.04	19.936	54.513	63.682	21.18	0.533	89.623	12.687	39.197	10.235	0	0.036	39.73	53.98	4.199	3.95	74.818	0	3
183	0.00133683	2.29546	93.813	0	0	0	0.326	0	0	0	AA......	0	93.271	0	86.143	0.326	83.502	0	92.113	0	88.965	0	90.014	3.437	89.834	0.072	0.868	9.515	0.036	1.122	0.036	3.871	6.064	3.652	60.167	0	0
215	0.00132805	2.29935	74.601	0.109	0	0	0	0	0	0	AA......	0	91.473	0	85.559	4.427	68.396	0	91.437	0	92.235	0.399	84.579	0	93.469	0.036	0	0.762	2.104	0.218	1.488	6.06	5.115	3.772	65.595	0	0
224	0.00127867	2.3217	95.451	0.227	0	0	0.265	0	98.787	0.114	AA....UA	0	89.765	4.17	83.586	19.977	56.027	0	91.547	60.083	23.389	7.998	76.005	0.19	88.135	0	1.971	99.962	0	6.748	94.011	98.484	4.235	3.636	60.714	0	0
176	0.00126525	2.32793	99.162	0	0	0.076	0	0	0	0	AA......	0	90.168	0	91.349	0.114	88.796	0	93.14	0	91.997	2.553	72.79	0	91.578	0.61	0.229	0.343	0.114	2.668	8.232	0.076	3.829	3.612	63.493	0	0
147	0.00124162	2.33905	97.862	0.155	0	0	1.827	0	93.315	0	AA....UA	0	90.867	14.069	72.561	27.4	49.709	0	90.167	50.564	35.017	0.544	87.213	2.215	90.361	0	28.566	100	0	15.702	99.961	99.961	5.18	3.632	60.582	0	0
139	0.00123274	2.34329	99.961	0	0	0.196	0	0	0	15.451	AA....CA	0	92.431	0	97.02	0	94.078	0	92.235	0	92.471	0	92.941	0	86.784	6.157	100	61.686	0	0.039	2.353	0	3.717	3.716	60.965	0	0
28	0.00115163	2.38344	77.446	18.606	0	0.042	2.94	77.698	0	0.294	AA..cg..	0.168	87.946	0	87.19	0	88.114	0	91.012	0	89.71	0.21	93.28	0	93.994	3.402	0.042	0.294	0.21	1.344	1.932	0	3.219	3.693	62.837	0	0
154	0.00113509	2.39198	28.736	3.843	0	98.676	0	0	0.085	56.576	AAga..CA	0	90.094	16.225	57.686	0	91.332	0	89.539	0	94.193	0	95.858	1.708	87.617	5.124	99.957	49.915	0	0	0.128	4.398	4.533	3.779	63.661	0	0
142	0.00113496	2.39205	99.531	0	0	65.117	0	0	0	41.322	AAga..CA	0	87.335	0	92.026	71.471	3.326	0	90.49	0	95.906	0	93.859	0	89.68	0	0.128	1.578	0.043	0.554	0	0	3.223	3.537	60.733	0	0
184	0.00112555	2.39696	76.754	0	0	0.904	0	0.775	0.818	4.434	AA......	0	92.381	0	90.573	3.874	82.652	0	92.079	0	93.543	0.947	96.858	0.861	95.394	0	2.798	1.937	1.679	0.043	0	1.894	3.584	3.856	67.538	0	0
247	0.00109985	2.41058	83.817	4.31	49.956	15.699	1.011	0	99.868	0	AAaa..UA	0	88.61	2.287	89.49	5.453	84.037	0.66	85.356	4.09	85.444	8.663	70.229	10.554	80.607	0	1.671	1.715	0.132	2.946	99.736	100	4.822	4.107	82.9	0	0
98	0.00105626	2.43444	99.405	0	0	52.311	0.229	77.895	0	16.796	AAgacgCA	0	90.343	0	78.032	73.638	1.327	0	90.069	1.373	92.677	0	94.554	0	87.231	0	2.654	26.041	0	0.915	0.092	0.229	3.184	3.513	59.352	0	0
171	0.00105022	2.43783	98.623	0.092	0	0	1.331	0	98.209	0	AA....UA	0	92.195	10.514	79.936	12.489	61.892	0	91.23	70.064	17.126	6.979	79.063	10.147	80.992	0	4.408	100	0	4.637	98.485	99.954	4.809	3.627	60.288	0	0
169	0.00100378	2.46451	94.262	3.616	0	0	0.145	29.605	0	0.048	AA..cg..	0	88.525	0	89.151	0	83.269	0	91.659	0	92.912	0.53	79.797	0	94.069	0	3.423	100	0	0.434	1.88	0.289	3.475	3.703	60.701	0	0
44	0.000937942	2.50454	95.351	0	0.671	0	0	0	0	96.229	AA....CA	0	90.341	0	93.492	0	91.89	0	91.839	45.764	26.963	0	89.101	0	90.289	0.207	0.93	0.517	0.155	100	98.244	1.601	4.819	3.682	135.807	2	1769
120	0.000905993	2.52498	43.23	10.608	0.426	90.938	0.16	0	3.571	1.173	AAga....	0	89.659	54.211	6.77	0	91.684	0	86.674	52.292	20.043	5.704	84.382	0	94.03	0.373	0.16	0.053	0.16	0.053	34.701	5.277	4.985	4.027	77.904	0	0
135	0.000871748	2.54772	98.709	0	0	0	0.393	0.112	0	0.898	AA......	0	86.308	0	92.424	84.007	0	0	95.791	0	95.791	0.056	76.375	0	92.593	0.393	76.824	100	0	0.168	6.173	97.138	4.543	3.648	58.977	0	0
56	0.000836994	2.57172	53.86	2.031	0	74.463	0	0	0	0	AAga....	0	93.035	0.348	90.366	0	80.731	0	89.495	8.009	81.776	0	89.553	0	90.598	0	0.058	16.077	0.29	1.683	13.465	4.527	4.475	3.968	71.596	0	0
122	0.000835693	2.57264	99.248	0	0	0	0	0.289	0	0	AA......	0	90.567	0	93.75	0	85.648	0	85.417	1.562	92.766	56.829	1.447	0	95.197	0	5.556	100	0	10.243	87.384	40.162	3.739	3.621	58.827	0	0
31	0.000812757	2.58906	92.093	0	0	0	1.665	0	0	0	AA......	0	90.904	0	88.704	0	84.958	0	92.568	0	94.233	0	94.471	19.144	69.203	0	2.14	10.107	0	0.178	0.059	71.046	5.824	3.656	59.491	0	0
80	0.000788341	2.60705	9.915	0.182	79.745	6.387	3.589	0	83.09	0	..aa..UA	0	91.484	2.068	85.645	5.9	82.482	0	90.693	11.8	76.886	3.65	78.041	2.616	87.348	0.182	6.752	30.535	0.061	15.511	99.148	100	5.371	3.69	62.148	0	0
177	0.00077829	2.61463	96.092	0	1.055	0	0	0	0	97.27	AA....CA	0	90.881	0	93.983	0	92.122	0	93.424	5.025	65.571	1.799	89.702	0	89.64	0.62	3.04	0.248	0.124	33.685	28.474	0.31	5.023	3.755	141.841	1	1546
206	0.000729592	2.65275	98.81	0	0	0	0.397	0	1.521	0	AA......	0	85.317	0	90.344	62.368	0.265	0	87.897	0	75.066	0	81.481	0.728	94.246	4.034	0.198	0.066	0.198	93.519	93.717	99.603	5.833	4.186	86.731	0	1
234	0.000700057	2.67713	97.665	0	0.275	0.755	11.264	0	2.198	0.481	AA..ug..	0	90.179	0.206	85.096	0.893	71.497	0	92.514	0	92.17	0	92.788	0.343	93.132	0.069	0.549	4.67	0	2.885	3.571	81.731	5.471	3.668	60.921	0	0
212	0.000657655	2.71399	74.357	1.102	0.441	19.324	2.131	0	24.908	14.695	AAga..UA	0	84.35	0.294	84.203	36.958	50.771	0	89.346	0	73.622	0.514	87.436	0	93.902	0.22	58.707	15.797	1.396	69.214	2.866	4.996	4.975	4.084	79.826	0	0
93	0.000649681	2.72119	98.958	0	0	0	1.86	0	0	0	AA......	0	86.458	0	90.625	63.914	0	0	88.318	0	80.878	2.232	91.89	0.074	92.411	0.074	0	0.149	0.074	100	100	100	5.293	4.174	86.626	0	0
66	0.000644757	2.72568	0	0	0	0.823	0	0	99.85	0	......UA	0	96.933	0	80.778	0	88.482	0	90.875	0	94.091	75.318	0	0	92.969	0.748	57.367	50.785	0	3.366	7.105	33.283	4.457	3.797	64.324	0	0
72	0.000638292	2.73162	95.061	0	0	54.179	0.76	0.532	0.228	58.891	AAga..CA	0	87.766	0	91.261	52.584	29.559	0	90.198	2.584	91.413	2.204	90.502	0	89.59	0	0.076	1.064	0.304	1.748	3.267	0.912	3.434	3.655	66.096	0	8
211	0.000619726	2.74904	0.233	1.788	91.291	0.778	5.288	0	97.356	0.933	..aa..UA	0	92.846	0.311	93.157	51.788	16.252	0	87.636	12.519	77.138	0	86.314	19.829	62.675	0	3.266	90.358	0	4.899	96.423	96.034	5.071	3.636	60.193	0	0
78	0.000599589	2.76853	46.517	2.002	0	0.16	0	2.562	0	0	AA......	0	91.914	0	86.709	0.48	78.143	0	91.914	0	91.753	0.721	80.785	0	95.436	0	0	0.24	0.32	0.48	3.923	5.604	4.948	3.719	63.458	0	0
245	0.000594599	2.77346	4.214	1.378	0	7.374	1.702	0	98.947	0	......UA	0	88.817	2.674	88.817	0.891	69.449	0.243	89.465	3.971	79.254	50.972	30.389	0.324	93.598	0.081	3.728	70.827	20.421	94.976	97.974	98.947	4.834	4.074	77.272	0	0
96	0.000575187	2.79304	0	0	7.307	0.085	1.105	0	98.301	0	......UA	0	95.327	0	93.458	15.888	68.394	0	89.805	5.523	61.342	0	90.654	0.17	93.968	0	18.267	100	1.869	93.628	100	100	6.109	4.049	75.597	0	0
22	0.000572322	2.79599	98.975	0	0	0	0	0	0	0	AA......	0	83.177	0	89.667	65.414	0.085	0	87.874	0	78.224	0	71.99	7.003	82.152	0.256	0	0.427	0.256	100	82.237	82.75	5.582	4.14	88.644	0	9
187	0.000557621	2.81134	98.354	0.347	0	0.087	0	20.971	0	55.893	AA..cgCA	0	88.475	0	88.821	0	83.189	0	91.248	0	94.194	0.26	87.955	0	92.201	0.26	0.087	0.173	0	20.711	100	4.419	5.533	3.651	60.019	0	0
196	0.000551112	2.81827	54.035	14.211	0	2.281	0	32.456	0	0.351	AA..cg..	0	91.667	0.439	80.351	0	89.825	0	91.053	54.912	5.526	10.702	77.018	0	83.421	2.719	9.912	4.737	0	0.702	93.158	5.088	4.395	4	79.366	0	0
225	0.000536329	2.83431	53.015	15.392	0	1.35	0.72	0	0	0	AA......	0	90.549	0	85.959	0.81	82.808	0	89.559	0	90.459	0	85.779	2.16	90.369	0	1.71	4.32	1.35	0.09	0	0.99	4.298	3.834	70.514	0	0
188	0.000521457	2.8509	98.503	0	0.468	0	40.131	0	2.152	0	AA..ug..	0	92.236	0.094	88.12	0.281	91.955	0	92.984	0	88.213	0	90.645	0	93.732	0.094	0.842	2.9	0.187	8.606	4.49	99.158	5.148	3.655	64.137	0	0
126	0.000516792	2.85621	15.14	0	75.047	0	0.561	0	0	0	AAaa....	0	89.533	18.785	43.084	0	92.617	0	91.215	0	87.57	0	94.486	0	92.056	0	0.093	7.009	0.374	28.972	2.336	99.533	6.055	3.679	62.857	0	0
223	0.000514313	2.85904	0	0	37.582	0	2.156	0	99.531	0	..aa..UA	0	89.691	0	92.784	18.088	63.636	0	86.879	9.841	71.509	0	89.691	5.717	86.41	0	2.999	100	3.28	68.322	99.719	100	5.717	3.921	70.727	0	0
27	0.000514172	2.8592	0	0	0	0	0	0	0	20.469	......CA	0	93.897	0	92.019	45.446	25.634	0	90.516	0	88.357	35.023	51.455	0	93.991	0.469	0.563	97.371	0.469	0.188	53.333	3.38	4.512	3.901	69.152	0	0
8	0.000512394	2.86125	52.079	2.079	0	98.582	0	0	0.095	14.839	AAga..CA	0	92.911	0.945	84.594	0	91.304	0	87.996	0	93.195	0	96.125	67.297	17.58	0.473	100	46.975	0	0	0.095	9.074	4.882	3.862	66.773	0	0
162	0.000510967	2.86289	0	0	73.774	0.094	1.792	0	99.623	0	..aa..UA	0	93.113	0	93.679	30.283	51.887	0	89.34	48.585	27.075	0	84.811	15.755	72.358	0	3.113	99.906	22.925	42.453	100	100	5.385	3.698	64.558	0	0
76	0.000487179	2.89102	67.031	18.769	0.099	65.74	0	0.794	0	0.894	AAga....	0	89.672	4.071	82.92	2.979	87.19	0	89.474	71.202	1.887	23.932	65.343	28.798	58.59	0	0.099	0.298	0	4.171	100	81.331	4.536	4.017	76.464	0	0
2	0.000486606	2.89172	99.899	0	0	0	0	0	0	0	AA......	0	90.625	0	90.524	62.097	0	0	87.601	9.476	69.758	81.25	2.016	0	93.246	0.101	0	0	0	100	100	8.065	5.726	4.216	88.937	0	0
85	0.000470892	2.91108	91.786	2.259	0	89.528	0	0	0	0.205	AAga....	0	87.988	0.103	86.345	6.057	85.626	0	93.121	0	90.965	0	95.072	14.066	78.747	0.821	16.119	7.29	0	0	0	6.571	4.485	3.868	68.152	0	0
127	0.000464588	2.91904	0.104	0.312	0	0	0.312	0	0	97.503	......CA	0	93.132	0	84.391	0	90.947	0	91.779	0	80.333	0	96.462	0	89.074	0	0	41.519	0	0.104	99.688	1.249	5.966	3.718	63.686	0	0
217	0.000463818	2.92001	70.921	4.184	3.033	25.628	0	2.51	0	95.502	AAga..CA	0	91.841	0	91.213	0	85.146	0	89.435	27.51	49.582	1.569	83.368	0	91.109	0	44.247	6.381	0.105	0	100	0.523	4.54	3.956	86.048	0	10
73	0.000456746	2.92908	11.299	0	0.528	0	1.584	0	99.155	0	AA....UA	0	93.031	0	91.763	17.635	64.942	6.653	81.415	7.709	58.923	0	86.589	0.422	92.291	0	4.541	100	87.012	100	99.472	100	6.706	4.036	76.946	0	1
137	0.000452985	2.93396	17.377	15.032	14.712	5.544	1.173	0	92.537	0	XXaa..UA	0	89.872	6.29	85.288	3.518	88.38	0.959	88.38	6.61	72.921	1.386	83.582	0	92.537	0	3.305	5.757	0	1.599	94.136	99.574	4.424	3.855	68.332	0	0
39	0.000444995	2.94446	1.85	3.591	0	63.874	0	0	99.565	0	..ga..UA	0	93.58	0.871	91.295	0	84.984	1.632	82.807	29.924	37.214	4.897	77.258	7.617	81.719	5.005	2.285	5.332	12.187	26.115	99.891	100	4.957	3.817	69.895	0	0
219	0.000440845	2.94998	99.232	0	0	0	1.427	84.303	0	11.636	AA..cgCA	0	90.34	0	89.352	0.878	86.279	0	86.169	1.317	92.536	0.329	92.975	0	89.791	0.11	1.317	100	0	6.257	5.928	0.11	3.826	3.602	59.717	0	0
241	0.000440204	2.95084	98.901	0	0	0.11	5.604	2.637	0.22	0	AA......	0	91.978	0.44	87.033	6.374	71.538	0	90	0	93.626	0.22	92.967	0	88.022	0	2.198	99.89	0.11	0.33	0.879	14.835	4.242	3.642	59.403	0	0
213	0.000439985	2.95114	75.465	5.257	4.819	83.023	0	0	11.501	0	AAga..UA	0	88.828	2.629	87.185	1.752	89.485	0.548	89.266	66.484	10.515	0.329	85.761	6.791	85.214	0	0.876	0.548	0.11	1.862	86.637	98.576	5.057	4.027	77.13	0	0
210	0.000424695	2.972	48.811	0	51.755	0	15.289	0	0.113	0	AAaaug..	0	91.166	39.524	31.144	14.27	77.35	0	91.28	0	92.186	0	92.865	0	94.564	0	1.019	7.814	0	2.831	2.492	100	6.19	3.801	67.275	0	1
115	0.000422652	2.97485	72.082	2.975	0	99.542	0	0	0	4.462	AAga....	0	93.936	80.778	1.602	0	85.927	0	87.872	0	94.508	0	91.876	56.751	25.973	3.661	100	38.33	0.801	0.229	0.229	45.423	4.7	3.992	72.165	0	0
15	0.000415503	2.98491	86.845	0	0.116	1.63	0.349	0	84.983	0	AA....UA	0	91.036	0	91.502	55.53	0.931	0	90.221	0.466	86.38	0.116	90.803	0.233	91.502	0.116	0	0.466	0.116	22.352	31.548	99.884	4.953	4.119	91.847	0	0
109	0.000411897	2.99006	5.041	0	0.117	6.213	0	0	0.117	26.729	......CA	0	87.691	0	94.725	4.924	79.601	0	89.097	0	87.808	0	92.849	0	95.193	0	20.164	10.903	0	0.469	3.517	0.586	4.542	4.019	75.076	0	0
91	0.000402216	3.00409	97.115	0	0	0	0	0	0	56.25	AA....CA	0	86.418	1.322	89.303	14.543	68.269	0	91.466	0.962	91.106	21.755	68.63	0	93.75	10.096	99.159	99.038	0	9.375	49.038	5.769	4.671	3.62	58.861	0	0
232	0.000392022	3.01924	100	0	0	0	0	0	0	0	AA......	0	86.94	0	90.796	62.562	0	0	85.075	0	88.557	60.572	22.761	2.239	89.801	2.114	0	0	1.119	100	100	99.751	5.317	4.221	86.825	0	0
45	0.000390597	3.02139	98.637	0.248	0	0.124	0	66.047	0	22.429	AA..cgCA	0	89.715	0.124	87.732	0	77.695	0	91.202	0.372	95.911	0	86.493	0	93.432	0.248	0.248	1.735	0.124	21.933	100	1.487	5.16	3.633	58.655	0	0
35	0.000376372	3.04327	0	0	98.329	0	2.828	0	94.859	0	..aa..UA	0	89.717	0	91.131	44.216	46.658	0	87.918	12.853	78.535	0	83.676	40.617	44.859	0	2.442	100	0	20.951	100	100	6.265	3.599	58.966	0	0
226	0.000365977	3.0598	95.263	0.921	0	55.526	0	0.526	0	0	AAga....	0	89.737	0.132	87.5	13.289	73.421	0	91.316	0	91.053	0	96.053	20.132	70.921	0	0.526	41.053	0	0	0	6.974	4.993	3.777	64.809	0	0
191	0.000365897	3.05993	42.536	1.717	0	0.132	8.058	0	0	0	AA......	0	89.696	0	90.753	0.528	85.997	0	92.074	0	91.413	0	84.016	0	95.112	0	0	0.264	0.132	0	0.396	0.925	3.95	3.841	67.143	0	0
46	0.000352047	3.08269	92.033	0	0	0	0	0.275	0	47.802	AA....CA	0	89.286	0	90.797	49.176	0.412	0	92.033	0	91.896	0	97.115	1.648	93.269	0	10.44	10.989	0	0.275	0	2.06	4.332	3.605	58.08	0	0
221	0.000325181	3.12953	28.446	0.44	79.912	2.786	0.88	0	64.516	0	AAaa..UA	0	90.469	1.026	86.95	0.88	89.15	0	92.962	0.88	89.003	0.147	81.818	0.587	92.229	4.692	8.798	5.425	1.026	41.935	100	100	5.362	3.656	61.035	0	0
205	0.000323854	3.13194	0	0	98.806	0	0.597	0	25.075	49.104	..aa..CA	0	84.627	0	86.269	83.881	0.149	0	89.254	0	92.985	0	88.507	3.881	86.866	0	68.657	100	0	27.612	46.269	21.343	4.623	3.626	60.257	0	0
95	0.000321253	3.1367	1.053	0	0	0	0	0	0	38.947	......CA	0	91.579	0	94.436	0	93.835	0	85.113	0	93.383	89.474	0	0	90.226	0.301	0.752	0	0	0.752	100	0.15	6.143	4.073	79.33	0	0
88	0.000320857	3.13743	98.494	0	0	0	0.151	65.964	0	0.753	AA..cg..	0	93.223	0	90.06	0	80.271	0	92.47	0	92.771	0	95.331	0	92.319	0.151	10.843	100	0	4.066	15.06	0	3.955	3.619	58.321	0	0
133	0.000312872	3.1523	100	0	0	0.155	0	1.236	0	40.958	AA....CA	0	88.717	0	91.808	2.782	80.216	0	90.881	0	94.745	0.309	86.09	0	93.509	0.155	6.182	95.209	0	16.229	100	2.164	5.351	3.613	58.161	0	0
11	0.000308398	3.16079	0	0	34.621	0	0.309	0.155	59.815	19.32	..aa..UA	0	91.963	0	87.944	20.402	58.887	0	92.272	5.41	85.626	52.396	33.385	0.155	88.253	0.155	20.711	54.56	0	5.564	27.821	28.284	4.399	3.732	62.619	0	0
63	0.000307255	3.16298	8.333	0.786	0	14.465	0	1.887	0	0	..ga....	0	91.509	0	85.22	0	79.245	0	89.78	0	90.252	0	89.151	0	96.384	0	3.459	0.472	3.145	0	1.258	5.975	4.002	3.922	71.052	0	0
110	0.000296428	3.18415	5.212	0	0	0	0	0	0	11.726	......CA	0	98.046	0	93.485	15.635	67.752	0	89.251	0	89.251	0	87.622	0	93.322	0.326	2.117	100	0	0.163	10.586	0	4.384	3.887	68.858	0	0
40	0.000293145	3.19072	96.86	0	0	24.793	0	0	0	0	AAga....	0	91.736	0	90.083	9.421	36.86	0	88.099	0	93.554	2.149	79.174	0	94.545	0	0	0	0.165	1.488	5.95	0	3.788	3.509	59.897	0	1
36	0.000292303	3.19242	98.675	0	0	0	8.94	0	99.007	0	AA....UA	0	91.887	0	90.563	77.815	0	0	86.921	0	80.795	0	76.821	0.662	89.57	0	5.298	5.96	0	98.675	99.338	99.834	5.609	4.232	89.861	0	0
19	0.000286969	3.20328	38.111	0	0.337	0.169	0	0	0	99.325	AA....CA	0	92.58	0	91.062	0	92.074	0	85.329	0.169	84.317	85.497	0.169	0	95.278	0	0.169	0.337	0	28.668	99.157	1.349	5.027	3.944	84.995	0	8
243	0.000286144	3.20498	93.074	0	0	0	0	0	0	1.689	AA......	0	89.358	0	82.432	28.378	4.223	0	91.216	0	93.412	0	96.284	1.182	95.777	0	3.547	3.209	0	0.169	0	0	4.618	3.621	58.311	0	0
29	0.000284973	3.2074	97.453	0	0	0	0	1.528	0	0	AA......	0	90.492	0	86.248	0	89.474	0	89.813	0	88.625	2.207	78.608	0	92.02	0	0.509	20.883	0.17	96.435	100	12.564	4.606	3.991	76.326	0	0
101	0.000284761	3.20784	3.565	8.659	0	99.491	0.509	0	0	73.514	..ga..CA	0	91.681	79.626	0.34	0	88.115	0.509	86.248	0	95.076	0	95.756	0	89.813	1.188	99.491	46.35	15.45	0.34	0.17	1.019	4.74	3.754	66.001	0	0
58	0.000270521	3.23811	13.214	0	90.179	0	0.357	0	6.607	0	AAaa....	0	90.893	63.393	8.214	0	83.214	0	90.893	0	91.786	0	93.75	9.286	82.321	0	0	0.893	0.179	0	3.393	100	5.426	3.677	60.829	0	0
151	0.000265278	3.24966	0	0	0	0	0	0	0	35.701	......CA	0	89.617	0	89.253	57.377	7.286	0	90.528	0	85.792	51.002	21.311	0	91.621	0	0	98.725	0	0	96.903	3.461	4.731	3.856	66.78	0	0
158	0.000263002	3.25474	33.64	48.346	0	3.493	0	2.574	0	1.287	GA......	0	91.728	1.287	56.434	0	89.706	0	93.566	24.632	46.507	1.654	90.441	18.934	68.566	0	28.676	17.279	0	0.551	51.287	95.404	5.12	3.917	72.063	0	0
182	0.000245801	3.29465	40.828	4.339	0	85.207	0.197	6.312	0	59.566	AAga..CA	0	92.308	0.394	90.533	0	85.996	0	89.744	57.396	9.27	65.878	16.568	0	92.11	0.394	3.156	0	0	10.651	99.211	2.959	4.225	3.731	64.867	0	0
83	0.00024385	3.29935	96.032	0	0	0	0	0	0	0	AA......	0	88.492	0	89.881	16.071	66.468	0	90.278	0	93.254	2.183	79.563	0	92.857	0.198	0	5.159	0	0.397	4.365	4.365	5.182	3.657	59.259	0	0
146	0.000243623	3.2999	94.048	1.587	0.198	2.183	0	0	0	93.254	AA....CA	0	93.056	0.794	91.468	0	90.873	0	91.27	2.183	87.897	0	91.468	0	93.452	0	0.794	24.405	0.198	92.063	100	5.159	5.775	3.994	75.793	0	0
82	0.000235889	3.31893	39.796	5.102	0	71.429	0.204	0	29.796	0.204	AAga..UA	0	86.939	52.245	27.347	0	87.551	0	93.265	33.265	36.735	0	80.204	0	92.245	0	50	2.449	0.204	1.02	80.612	82.653	5.616	3.819	71.524	0	0
179	0.000232974	3.32627	98.96	0	0	0	0.208	29.938	0	0	AA..cg..	0	91.684	0	88.565	0.416	78.794	0	91.06	0	92.723	0	93.971	0.416	90.644	0.416	0.208	1.455	0	1.455	0	0.208	4.483	3.586	59.109	0	0
233	0.000232518	3.32742	30.533	0.205	0	5.328	1.434	0	95.902	0	AA....UA	0	91.189	0	88.525	7.377	71.516	0	87.09	6.762	66.598	0	88.32	1.639	87.295	0	3.279	56.148	58.607	99.18	98.566	100	5.954	4.072	78.383	0	0
222	0.000225082	3.3466	39.309	0	0.864	0.432	4.32	0	94.168	0	AA....UA	0	89.849	0	90.713	45.14	37.149	0	88.985	23.11	53.996	0	84.665	2.376	89.849	0	1.08	61.123	23.11	99.568	99.136	100	6.062	4.09	79.982	0	0
168	0.000217175	3.3677	32.886	0.895	0	76.51	0	0	0.224	89.933	AAga..CA	0	87.919	12.528	73.826	0.224	90.157	0	89.262	0.224	90.828	13.199	77.181	0	94.183	0	4.251	6.04	0	7.606	5.593	0.447	4.983	3.757	64.581	0	0
244	0.000216044	3.37078	38.702	57.494	0	17.673	0	0	0	92.17	GAga..CA	0	93.289	0	92.841	0	88.814	0	94.407	1.566	82.774	0	91.723	0	96.868	0.671	2.013	0	0	4.027	47.204	4.251	5.579	3.877	68.652	0	1
105	0.00020836	3.39215	0	0	0	2.093	0.698	0	0	98.837	......CA	0	93.256	0	86.047	3.023	80.233	0	93.256	0	91.628	4.651	92.791	0	93.953	0	0.233	3.488	0.233	0.698	5.116	0.93	5.606	3.743	64.629	0	0
172	0.00020402	3.40456	1.182	0	95.035	0.946	7.092	0	24.823	0	..aa..UA	0	88.652	63.593	3.783	0	60.52	0	94.563	0.236	93.381	0	93.381	23.877	59.102	0	0.473	0	0	0.946	2.6	99.527	4.708	3.628	59.32	0	0
17	0.000202149	3.41	41.627	1.196	0	0	0.478	0	0	0	AA......	0	92.584	0	86.603	0	75.12	0	86.364	0	90.191	0	79.665	0	94.019	0	0	0	0	0.239	0	0.239	4.386	3.851	66.346	0	0
103	0.000201917	3.41068	1.914	0.239	0	1.675	0	0	0	44.976	......CA	0	90.191	1.675	86.842	0	80.861	0	85.885	0.718	88.038	1.435	83.254	0	95.694	0.478	0.478	3.828	0.478	0	99.761	5.742	4.608	4.053	75.919	0	0
199	0.000192831	3.43784	79.597	0	0	0	0.756	0	98.741	0	AA....UA	0	86.146	28.463	52.393	18.64	58.69	0	89.924	50.378	38.035	9.572	74.559	15.617	75.315	0	3.526	100	0.252	36.272	99.748	100	4.984	3.613	61.066	0	0
69	0.000191142	3.44303	34.848	0	0	0	0.505	0	0	0	AA......	0	92.929	0	85.606	60.859	22.475	0	89.899	0	86.364	0	84.848	0	90.152	0	9.343	21.212	1.768	1.01	2.525	100	6.378	4.111	78.772	0	0
121	0.000182199	3.4713	99.734	0	0	0.266	0	0	0	0	AA......	0	88.298	0	85.106	0	87.234	0	89.362	0	80.851	0	93.617	0	94.415	0.798	2.66	22.34	0.266	31.383	1.596	100	6.045	4.048	80.162	0	0
54	0.000173164	3.50131	0	0	0	0	0	0	0	0	........	0	90.782	0	90.223	0	86.592	0	95.251	0	90.503	0	83.52	0	96.369	0	0	2.235	37.151	0	1.117	3.631	5.734	3.943	88.417	0	0
113	0.000170358	3.51095	92.635	0	0	1.133	0	0	0	0	AA......	0	92.351	0	87.535	0	87.252	0	86.402	1.416	81.02	0.283	89.518	0	94.334	0.283	0	35.694	0.283	79.32	100	29.178	5.257	3.955	72.289	0	0
49	0.00016902	3.5156	0	0	0	0	0	0	0	0.571	........	0	94.286	0	89.714	6	75.143	0	89.714	0	90.571	0	91.143	0	92.857	0.286	0	100	0.571	0	18.571	0	4.677	3.945	71.39	0	0
3	0.000160668	3.5455	1.807	0	0	0	0	0	0	0	........	0	86.747	0	87.651	0	83.133	0	90.361	0	91.265	0	87.651	0	95.181	0.904	0	0.904	6.024	0	0.602	4.217	5.922	3.927	72.577	0	0
14	0.000139471	3.62898	49.135	0	37.024	0	4.498	0	0	0	AAaa....	0	90.311	26.298	45.329	44.291	46.021	0	93.772	0	91.003	0	84.083	0	92.734	0	1.73	5.882	0	0	0.692	100	6.99	3.927	72.068	0	0
30	0.000136871	3.64008	98.227	0	0	0	0.709	0	9.574	0	AA......	0	93.262	0	92.553	72.34	0	0	93.262	0	94.326	0	85.816	0	94.681	35.816	3.901	2.837	0	0.709	2.128	100	6.264	4.241	89.206	0	0
97	0.000131635	3.66309	88.645	0	0	0	0	0	0	1.832	AA......	0	91.575	0	87.179	12.454	49.084	0	91.941	0	94.139	0	95.971	6.227	89.744	2.564	0.733	4.762	0	0.366	0	4.762	6.207	3.641	58.821	0	0
130	0.000124749	3.69479	100	0	0	0	0	0	0	0	AA......	0	86.275	0	89.02	58.431	0	0	88.627	0	72.157	0	85.882	0	92.157	3.529	0	0	0	100	100	99.608	5.478	4.23	89.382	0	0
10	0.000122748	3.70433	3.543	0	52.362	40.945	0	8.661	0	80.315	..aa..CA	0	90.945	0	90.945	0	90.945	0	82.283	31.89	0	0.787	85.827	0	85.039	0	0	14.173	0	0	100	0	5.131	3.751	65.278	0	0
134	0.000119355	3.72087	87.854	0	0	0	0	0	0	0	AA......	0	85.83	0	91.903	0	85.425	0	90.688	0	92.713	39.271	4.858	0	96.761	0	2.024	97.571	0.405	2.429	78.543	80.567	5.75	3.618	58.761	0	0
156	0.000118543	3.7249	0	0	0	0	0	0	0	0	........	0	89.796	0	83.265	0	80.408	0	93.469	0	94.286	0	90.204	0	94.694	0	0	0.408	8.98	0	0.408	9.388	5.396	3.981	77.232	0	0
194	0.000113744	3.74928	57.627	0	31.78	0	0	0	0	0	AAaa....	0	87.712	19.068	48.729	0.847	86.864	0	91.102	0	87.712	0	93.22	0	91.525	0	0.424	9.322	0.424	20.763	0.847	100	6.415	3.748	75.767	0	2
57	0.000108288	3.77829	100	0	0	0	0	0	0	0	AA......	0	97.768	0	82.589	0	84.375	0	88.839	0	89.286	0	94.196	0	93.75	0	8.036	100	0	3.125	0.446	0	3.955	3.643	59.424	0	0
185	0.000108214	3.77869	100	0	0	0	0	6.25	0	0	AA......	0	90.625	0	91.518	61.607	15.179	0	87.5	0	94.643	0.446	95.089	0	94.196	0	0	100	0	0	0.446	0.893	4.276	3.614	58.306	0	0
218	0.000108168	3.77894	0	0	0	0	0	0	0	20.089	......CA	0	87.5	0	91.071	0	85.714	0	95.536	0	95.089	74.554	0.446	0	91.518	0	0	8.929	0	13.393	99.554	8.036	5.006	3.707	63.548	0	0
106	8.99572e-05	3.88771	96.237	0	0	0	0	0	0	0	AA......	0	77.957	0	90.323	8.602	71.505	0	93.548	0	91.398	0	84.946	0	94.624	19.892	0.538	0.538	0	0.538	1.075	1.075	3.707	3.673	59.757	0	0
99	8.45021e-05	3.92462	94.828	0	0	0	0	0	0	0	AA......	0	86.207	0	85.632	77.011	0	0	88.506	0	80.46	0	90.805	0	90.23	0.575	0	5.172	0	100	100	100	6.357	4.244	92.965	0	0
230	8.35292e-05	3.93145	57.803	6.936	0	17.919	0	12.139	0	0	AAgacg..	0	89.017	0	86.127	0	90.173	0	90.751	68.208	0	0	87.283	1.156	91.908	0	0	8.092	0	0	100	98.266	4.744	3.862	73.437	0	0
4	7.73202e-05	3.97702	59.375	0	0	0	0	0	0	98.75	AA....CA	0	94.375	0	95.625	0	93.75	0	86.25	1.25	77.5	0	93.125	0	91.875	0	7.5	0.625	0.625	8.125	15.625	0	5.569	3.743	144.33	0	159
220	7.72367e-05	3.97766	0	0	0	0	0	0	0	3.125	........	0	98.125	0	91.875	0	83.75	0	94.375	0	89.375	1.875	87.5	0	94.375	0	0	43.125	0	1.25	18.125	0	4.215	3.845	66.937	0	0
197	6.33507e-05	4.09459	4.58	16.794	0	42.748	0	0	99.237	0	GAga..UA	0	87.786	1.527	83.206	4.58	61.832	0	93.13	8.397	72.519	0	87.786	4.58	87.786	0	0.763	8.397	9.16	68.702	100	100	5.722	4.02	75.543	0	0
23	6.33162e-05	4.09491	17.557	0.763	0	100	0	0	0	99.237	AAga..CA	0	91.603	0	74.046	0	93.893	0	87.023	0	93.13	0	97.71	0	93.13	0	100	41.221	0	0	0	0	4.161	3.679	60.38	0	0
77	6.32897e-05	4.09516	100	0	0	0	0	0	0	0	AA......	0	90.84	0	89.313	0	91.603	0	94.656	0	90.84	0	82.443	0	91.603	0	0	0	89.313	0.763	0.763	0	3.997	3.607	62.505	0	0
102	5.89186e-05	4.13738	0	0	0	0	0	0	0	9.016	........	0	97.541	0	93.443	3.279	77.869	0	93.443	0	89.344	0	84.426	0	98.361	0.82	2.459	55.738	0	0	0.82	0	3.897	3.807	65.345	0	0
90	5.41203e-05	4.1875	94.643	0	0	0	0	0	0	3.571	AA......	0	90.179	0	83.036	0.893	87.5	0	96.429	0	92.857	1.786	77.679	0	86.607	0.893	100	100	0	0.893	4.464	93.75	4.274	3.624	59.095	0	0
18	5.40438e-05	4.18833	0	1.786	0	0	2.679	0	100	0	......UA	0	91.964	0	90.179	0	74.107	0	85.714	2.679	89.286	0	90.179	0	92.857	0	0	6.25	6.25	6.25	100	100	4.913	3.834	65.103	0	0
148	5.36692e-05	4.19244	95.495	0	0	0	0	0	0	0	AA......	0	95.495	0	87.387	1.802	75.676	0	93.694	0	90.09	2.703	84.685	0	92.793	0	0	7.207	0	0	3.604	6.306	6.7	3.654	61.019	0	0
24	5.31601e-05	4.19806	0	0	0	0	0	0	0	96.364	......CA	0	90.909	0	88.182	0	87.273	0	93.636	0	92.727	0.909	93.636	0	98.182	0	0	0	16.364	0	17.273	2.727	6.885	3.938	85.777	0	0
71	5.12399e-05	4.21977	0	0	0	0	0	100	0	0	....cg..	0	91.509	0	88.679	0	90.566	0	86.792	0	81.132	0	97.17	0	93.396	0	0	0	0	0	0	0	4.771	3.722	63.135	0	0
9	5.09092e-05	4.22359	98.077	0	0	0	15.385	0	0	31.731	AA..ugCA	0	85.577	0	84.615	81.731	0	0	98.077	0	91.346	0	89.423	0	95.192	0	42.308	100	0	17.308	3.846	21.154	4.771	3.649	60.326	0	0
74	4.39992e-05	4.30965	53.846	16.484	0	5.495	0	0	0	5.495	AA......	0	90.11	14.286	0	0	83.516	0	86.813	61.538	1.099	1.099	81.319	0	90.11	7.692	75.824	0	0	0	100	53.846	4.75	4.059	82.546	0	0
165	4.34055e-05	4.31767	7.778	4.444	63.333	1.111	5.556	0	6.667	0	..aa....	0	98.889	60	10	0	91.111	0	91.111	0	91.111	2.222	92.222	0	97.778	0	0	1.111	0	4.444	7.778	100	5.891	3.669	62.135	0	0
86	4.29824e-05	4.32345	0	0	0	0	0	0	0	6.742	........	0	78.652	0	91.011	2.247	79.775	0	88.764	0	85.393	77.528	2.247	0	94.382	0	0	8.989	0	41.573	97.753	1.124	5.252	3.71	65.793	0	0
37	4.25256e-05	4.32975	6.818	73.864	0	0	0	0	0	97.727	GA....CA	0	94.318	0	82.955	0	81.818	0	94.318	0	89.773	0	92.045	0	97.727	0	0	76.136	5.682	0	0	3.409	6.636	4.026	81.325	0	0
51	3.93834e-05	4.37504	98.765	0	0	0	0	0	0	0	AA......	0	79.012	0	92.593	39.506	0	0	86.42	0	75.309	14.815	69.136	8.642	79.012	0	0	0	0	100	100	100	5.686	3.953	79.682	0	0
16	3.72312e-05	4.4082	100	0	0	0	0	0	0	0	AA......	0	90.909	0	84.416	0	77.922	0	88.312	0	93.506	85.714	0	0	93.506	0	0	100	0	16.883	100	100	5.276	3.62	58.635	0	0
238	3.33732e-05	4.47274	21.739	0	0	0	0	0	0	0	AA......	0	88.406	0	75.362	0	78.261	0	91.304	0	86.957	1.449	81.159	0	94.203	0	0	0	0	0	1.449	2.899	4.575	3.824	66.406	0	0
68	3.33427e-05	4.47328	100	0	60.87	0	0	0	1.449	0	AAaa....	0	84.058	60.87	4.348	1.449	84.058	0	88.406	0	85.507	0	94.203	0	85.507	0	0	0	0	5.797	1.449	100	5.453	4.002	78.427	0	0
25	2.6621e-05	4.60611	100	0	0	0	0	0	0	0	AA......	0	90.909	0	81.818	0	92.727	0	80	0	96.364	47.273	0	0	94.545	0	80	100	0	10.909	89.091	0	3.424	3.597	58.641	0	0
38	1.93332e-05	4.79484	100	0	0	0	0	0	0	0	AA......	0	77.5	55	7.5	0	65	0	82.5	0	97.5	0	97.5	80	7.5	5	2.5	2.5	0	0	0	5	3.813	3.6	58.629	0	0
7	1.83596e-05	4.82532	97.368	0	0	0	0	0	0	0	AA......	0	78.947	0	86.842	0	100	0	86.842	0	94.737	0	76.316	0	94.737	100	0	0	0	2.632	0	0	3.893	3.626	63.691	0	0
65	1.64074e-05	4.89165	61.765	0	0	0	0	0	88.235	0	AA....UA	0	94.118	0	88.235	8.824	55.882	0	91.176	5.882	85.294	8.824	82.353	0	85.294	0	2.941	100	0	29.412	85.294	88.235	5.561	3.706	62.177	0	0
6	1.49751e-05	4.94555	0	0	0	0	0	0	0	93.548	......CA	0	93.548	0	80.645	0	74.194	0	93.548	0	100	80.645	0	0	90.323	0	0	0	0	3.226	100	0	5.011	3.765	65.008	0	0
131	1.44891e-05	4.96501	50	3.333	0	0	0	0	0	0	AA......	0	90	0	86.667	0	90	0	90	73.333	0	0	86.667	0	93.333	0	0	0	0	0	83.333	86.667	4.932	4.039	84.267	0	0
125	1.35314e-05	5.00536	100	0	0	0	0	0	0	0	AA......	0	85.714	0	92.857	53.571	0	0	92.857	0	78.571	0	100	0	100	0	0	0	0	0	0	0	4.453	3.66	60.489	0	0
34	1.15774e-05	5.09737	0	0	50	0	0	0	0	0	..aa....	0	95.833	70.833	0	0	91.667	0	95.833	0	91.667	0	70.833	0	95.833	0	0	0	0	8.333	33.333	100	5.788	3.618	60.021	0	0
116	9.18551e-06	5.23391	78.947	0	0	0	0	15.789	0	0	AA..cg..	0	78.947	0	89.474	0	89.474	0	100	0	89.474	0	100	0	100	0	0	0	0	0	0	0	4.003	3.616	59.692	0	0
